# Supplementary material
Source: MDPI journal article supplement (https://www.mdpi.com/1999-4907/13/10/1742)
Supplement: s1 [file s1]

**Table S1.** Rhizobacteria strains used in this study based on 16S gene sequencing.

| <b>Strain</b> | <b>Identified as</b>            | <b>Accession number</b> |
|---------------|---------------------------------|-------------------------|
| IPA25         | <i>Bacillus subtilis</i>        | MK787265                |
| IPA29         | <i>Bacillus sp.</i>             | MH590627                |
| IPA35         | <i>Bacillus sp.</i>             | MH590633                |
| IPA38         | <i>Bacillus polifermenticus</i> | MH590630                |
| IPA42         | <i>Bacillus sp.</i>             | MH590628                |
| IPA46         | <i>Bacillus sp.</i>             | MH590629                |
| IPA47         | <i>Bacillus sp.</i>             | MH590633                |
| IPA49         | <i>Bacillus pumilis</i>         | MH590633                |
| IPA50         | <i>Bacillus sp.</i>             | MH590635                |
| IPA52         | <i>Bacillus siamensis</i>       | MK787266                |
